# Supplementary material for: Effectiveness of Trauma-Informed Care Implementation in Health Care Settings: Systematic Review of Reviews and Realist Synthesis
Source: PubMed Central journal article supplement — Perm J. 2024 Mar 6;28(1):135–50. doi: 10.7812/TPP/23.127 (PMC10940237; doi:10.7812/tpp/23.127), 2024-03-06
Supplement: tpp_23.127-suppl-01.pdf [file tpp_23.127-suppl-01.pdf]

# Supplementary appendix 1. Search Strings

## MEDLINE (Ovid)

|   |                                                                                                                                                                                                                                                                                                                                                                                    |
|---|------------------------------------------------------------------------------------------------------------------------------------------------------------------------------------------------------------------------------------------------------------------------------------------------------------------------------------------------------------------------------------|
| 1 | (trauma-informed or trauma-sensitive or (trauma* adj2 framework) or (trauma* adj2 informed) or (trauma* adj2 sensitive)).tw.                                                                                                                                                                                                                                                       |
| 2 | review*.ab,ti. or review.pt. or overview*.ab,ti. or meta-analy*.ab,ti. or metaanaly*.ab,ti. or metanaly*.ab,ti. or meta-analysis.pt. or Meta-Analysis/ or meta-regression*.ab,ti. or metaregression*.ab,ti. or (meta adj regression*).ab,ti. or search*.ab. or synthes*.ab,ti. or metasynthes*.ab,ti. or meta-synthes*.ab,ti. or metaethnograph*.ab,ti. or meta-ethnograph*.ab,ti. |
| 3 | 1 and 2                                                                                                                                                                                                                                                                                                                                                                            |
| 4 | limit 3 to yr="2013-current"                                                                                                                                                                                                                                                                                                                                                       |
| 5 | ..dedup 4                                                                                                                                                                                                                                                                                                                                                                          |

## Embase (Ovid)

|   |                                                                                                                                                                                                                                                                                                                                                                                    |
|---|------------------------------------------------------------------------------------------------------------------------------------------------------------------------------------------------------------------------------------------------------------------------------------------------------------------------------------------------------------------------------------|
| 1 | (trauma-informed or trauma-sensitive or (trauma* adj2 framework) or (trauma* adj2 informed) or (trauma* adj2 sensitive)).tw.                                                                                                                                                                                                                                                       |
| 2 | review*.ab,ti. or review.pt. or overview*.ab,ti. or meta-analy*.ab,ti. or metaanaly*.ab,ti. or metanaly*.ab,ti. or meta-analysis.pt. or Meta-Analysis/ or meta-regression*.ab,ti. or metaregression*.ab,ti. or (meta adj regression*).ab,ti. or search*.ab. or synthes*.ab,ti. or metasynthes*.ab,ti. or meta-synthes*.ab,ti. or metaethnograph*.ab,ti. or meta-ethnograph*.ab,ti. |
| 3 | 1 and 2                                                                                                                                                                                                                                                                                                                                                                            |
| 4 | limit 3 to yr="2013-current"                                                                                                                                                                                                                                                                                                                                                       |
| 5 | ..dedup 4                                                                                                                                                                                                                                                                                                                                                                          |

## PsycINFO (Ovid)

|   |                                                                                                                                                                                                                                                                                                                                                                                               |
|---|-----------------------------------------------------------------------------------------------------------------------------------------------------------------------------------------------------------------------------------------------------------------------------------------------------------------------------------------------------------------------------------------------|
| 1 | (trauma-informed or trauma-sensitive or (trauma* adj2 framework) or (trauma* adj2 informed) or (trauma* adj2 sensitive)).tw. or exp Trauma-Informed Care/                                                                                                                                                                                                                                     |
| 2 | review*.ab,ti. OR overview*.ab,ti. OR meta-analy*.ab,ti. OR metaanaly*.ab,ti OR metanaly*.ab,ti. OR "Meta Analysis"/ OR meta-regression*.ab,ti. OR metaregression*.ab,ti. OR (meta ADJ regression*).ab,ti. OR search*.ab. OR synthes*.ab,ti. OR metasynthes*.ab,ti. OR meta-synthes*.ab,ti. OR metaethnograph*.ab,ti. OR meta-ethnograph*.ab,ti. OR ("0800" or "0830" or "1200" or "1300").md |
| 3 | 1 and 2                                                                                                                                                                                                                                                                                                                                                                                       |
| 4 | limit 3 to yr="2013-current"                                                                                                                                                                                                                                                                                                                                                                  |
| 5 | ..dedup 4                                                                                                                                                                                                                                                                                                                                                                                     |

## CINAHL (EBSCOhost)

|   |                                                                                                                                                                                                                                                                                                                                                                                                                                                                                                                                                                                         |
|---|-----------------------------------------------------------------------------------------------------------------------------------------------------------------------------------------------------------------------------------------------------------------------------------------------------------------------------------------------------------------------------------------------------------------------------------------------------------------------------------------------------------------------------------------------------------------------------------------|
| 1 | AB(trauma-informed or trauma-sensitive or (trauma* N2 framework) or (trauma* N2 informed) or (trauma* N2 sensitive)) OR TI(trauma-informed or trauma-sensitive or (trauma* N2 framework) or (trauma* N2 informed) or (trauma* N2 sensitive))                                                                                                                                                                                                                                                                                                                                            |
| 2 | (AB(review* OR overview* OR meta-analy* OR metaanaly* OR metanaly* OR meta-regression* OR metaregression* OR (meta N1 regression*) OR search* OR synthes* OR metasynthes* OR meta-synthes* OR metaethnograph* OR meta-ethnograph*) OR TI(review* OR overview* OR meta-analy* OR metaanaly* OR metanaly* OR meta-regression* OR metaregression* OR (meta N1 regression*) OR synthes* OR metasynthes* OR meta-synthes* OR metaethnograph* OR meta-ethnograph*) OR PT("Systematic Review") OR PT("Meta Synthesis") OR PT("Meta Ethnography") OR MH("Meta Analysis")) NOT PT("Book Review") |
| 3 | S1 AND S2, limit publication date to 2013 onwards                                                                                                                                                                                                                                                                                                                                                                                                                                                                                                                                       |

## Applied Social Science Index & Abstracts (ProQuest)

|   |                                                                                                                                                                                                                                              |
|---|----------------------------------------------------------------------------------------------------------------------------------------------------------------------------------------------------------------------------------------------|
| 1 | TI,AB(trauma-informed or trauma-sensitive or (trauma* NEAR/2 framework) or (trauma* NEAR/2 informed) or (trauma* NEAR/2 sensitive))                                                                                                          |
| 2 | TI,AB(review* OR overview* OR meta-analy* OR metaanaly* OR metanaly* OR meta-regression* OR metaregression* OR (meta NEAR/1 regression*) OR synthes* OR metasynthes* OR meta-synthes* OR metaethnograph* OR meta-ethnograph*) OR AB(search*) |
| 3 | 1 AND 2, limit publication date to 2013 onwards                                                                                                                                                                                              |
